# Supplementary material
Source: PubMed Central journal article supplement (PMC2693237)

# Development of Hydrogel TentaGel Shell-Core Beads for Ultra-high Throughput Solution Phase Screening of Encoded OBOC Combinatorial Small Molecule Libraries

*Hyoung Gee Baek, Ruiwu Liu, and Kit S. Lam\**

Division of Hematology and Oncology, Department of Internal Medicine, University of  
California Davis Cancer Center, 4501 X Street, Sacramento, California 95817

E-mail: Kit.lam@ucdmc.ucdavis.edu

## **Supporting Information**

|                                                                                                           |        |
|-----------------------------------------------------------------------------------------------------------|--------|
| Table of contents .....                                                                                   | S2-S5  |
| Copies of NMR and MS spectra for compounds <b>8</b> , <b>10</b> , <b>13</b> and <b>Fmoc-Ebes-OH</b> ..... | S6-S17 |

**Table 1. 96 Fmoc-amino acid used as building blocks for encoded model library**

|    | A                                               | B                                       | C                                                                     | D                                       | E                                           |
|----|-------------------------------------------------|-----------------------------------------|-----------------------------------------------------------------------|-----------------------------------------|---------------------------------------------|
| 1  | Fmoc-D,L-3-amino-3-(pyridyl)-propionic acid<br> | Fmoc-3-amino-2-benzylpropionic acid<br> | Fmoc-Ala-OH<br>                                                       | Fmoc-Arg(Pmc)-OH<br>                    | Fmoc-Asn-OH<br>                             |
| 2  | Fmoc-Asp(OtBu)-OH<br>                           | Fmoc-Cys(Trt)-OH<br>                    | Fmoc-Glu(OtBu)-OH<br>                                                 | Fmoc-Gln-OH<br>                         | Fmoc-Gly-OH<br>                             |
| 3  | Fmoc-His(Trt)-OH<br>                            | Fmoc-Ile-OH<br>                         | Fmoc-Leu-OH<br>                                                       | Fmoc-Lys(Boc)-OH<br>                    | Fmoc-Ser(tBu)-OH<br>                        |
| 4  | Fmoc-Met-OH<br>                                 | Fmoc-Phe-OH<br>                         | Fmoc-Pro-OH<br>                                                       | Fmoc-Tyr(tBu)-OH<br>                    | Fmoc-Thr(tBu)-OH<br>                        |
| 5  | Fmoc-Val-OH<br>                                 | Fmoc-Trp-OH<br>                         | Fmoc-D-Ala-OH<br>                                                     | Fmoc-D-Arg(Pmc)-OH<br>                  | Fmoc-D-Asn-OH<br>                           |
| 6  | Fmoc-D-Asp(OtBu)-OH<br>                         | Fmoc-D-Cys(Trt)-OH<br>                  | Fmoc-D-Glu(OtBu)-OH<br>                                               | Fmoc-D-Gln-OH<br>                       | Fmoc-D-His(Trt)-OH<br>                      |
| 7  | Fmoc-D-Ile-OH<br>                               | Fmoc-D-Leu-OH<br>                       | Fmoc-D-Lys(Boc)-OH<br>                                                | Fmoc-D-Ser(tBu)-OH<br>                  | Fmoc-D-Met-OH<br>                           |
| 8  | Fmoc-D-Phe-OH<br>                               | Fmoc-D-Pro-OH<br>                       | Fmoc-D-Tyr(tBu)-OH<br>                                                | Fmoc-D-Thr(tBu)-OH<br>                  | Fmoc-D-Val-OH<br>                           |
| 9  | Fmoc-D-Trp-OH<br>                               | Fmoc-glycine<br>                        | Fmoc-L-Norleucine<br>                                                 | Fmoc-Bpa-OH<br>                         | Fmoc-L-2-Naphthyl alanine<br>               |
| 10 | Fmoc-4-phenyl piperidine-4-carboxylic acid<br>  | Fmoc-L-pipecolic acid<br>               | N-Fmoc-Amino-(4-t-butoxycyclohexyl) carboxylic acid(Fmoc-Ahch-OH)<br> | Fmoc-1-amino-cyclohexan acetic acid<br> | Fmoc-3-aminocyclohexane carboxylic acid<br> |

**Table 1. (Continued)**

|    | F                                                                                                                                               | G                                                                                                                                                   | H                                                                                                                                          | I                                                                                                                                                                   | J                                                                                                                                                                         |
|----|-------------------------------------------------------------------------------------------------------------------------------------------------|-----------------------------------------------------------------------------------------------------------------------------------------------------|--------------------------------------------------------------------------------------------------------------------------------------------|---------------------------------------------------------------------------------------------------------------------------------------------------------------------|---------------------------------------------------------------------------------------------------------------------------------------------------------------------------|
| 11 | Fmoc-(+,-)-2-aminooctanoic acid<br>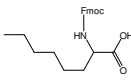                            | Fmoc-4,5-dehydro-L-leucine<br>                                     | Fmoc-2-aminoheptanoic acid(2-Ahe)<br>                     | Fmoc-D-3-Benzothienyl alanine<br>                                                | Fmoc-D-2-Aminobutyric acid<br>                                                         |
| 12 | Fmoc-D-4-Chlorophenyl alanine<br>                              | Fmoc-D-2-Fluorophenyl alanine<br>                                  | Fmoc-D-3-Pyridyl alanine<br>                              | Fmoc-D-4-Thiazolyl alanine<br>                                                   | Fmoc-D-Citruline<br>                                                                   |
| 13 | Fmoc-D-Tyr(Me)-OH<br>                                          | Fmoc-D-Bpa-OH<br>                                                  | Fmoc-penicillamine(trt)-OH(Fmoc-Pen(Trt)-OH)<br>          | Fmoc-Citruline(Fmoc-Cit-OH)<br>                                                  | Fmoc-β-cyclopropyl-alanine<br>                                                         |
| 14 | Fmoc-4-Hydrazinobenzoic acid<br>                               | Fmoc-Hyp(Bzl)-OH<br>                                               | Fmoc-Tyr(Me)-OH<br>                                       | Fmoc-sarcosine, (Fmoc-Sar-OH)<br>                                                | Fmoc-Tranexamic acid<br>                                                               |
| 15 | Fmoc-Phenylglycine(Fmoc-Phg-OH)<br>                           | Fmoc-Tert-Leucine,(Fmoc-Tle-OH)<br>                               | Fmoc-4-Amino-tetrahydropyran-4-carboxylic acid<br>       | Fmoc-β-Cyclohexyl-L-alanine(Fmoc-Cha-OH)<br>                                    | Fmoc-4-Carboxymethylpiperidine (Fmoc-Cmpi-OH)<br>                                     |
| 16 | Fmoc-Isonipetic acid, (Fmoc-Inp-OH)<br>                      | Fmoc-Nchg-OH<br>                                                 | Fmoc-L-1,2,3,4-Tetrahydronorhaman-3-carboxylic acid<br> | Fmoc-Tetrahydroisoquinoline-3-carboxylic acid(Fmoc-L-Tic-OH)<br>               | Fmoc-ε-Aminocaproic acid<br>                                                         |
| 17 | N-Fmoc-aminocyclohexyl Carboxylic acid<br>                   | Fmoc-α-amino-(4-pyridyl)acetic acid Fmoc-Apa-OH<br>              | Fmoc-Orn(pyrazinylcarbonyl)-OH<br>                      | Fmoc-Hydroxyproline(But)OH, (Fmoc-Hyp(tBu)-OH)<br>                             | Fmoc-L-3,4-Dichlorophenylalanine<br>                                                 |
| 18 | Fmoc-L-1-Naphthylalanine(Fmoc-Nal-1)<br>                     | Fmoc-L-2-Aminovaleric acid(Fmoc-Nva-OH)<br>                      | Fmoc-γ-carboxyl-L-glutamic acid-γ-di-t-butyl ester<br>  | Fmoc-4-(3-carboxymethyl-2-keto-1-benzimidazolyl-piperidine, (Fmoc-Ckbp-OH)<br> | Fmoc-3-carboxymethyl-1-phenyl-1,3,8-triazaspiro(4,5)decane-4-one, (Fmoc-Cptd-OH)<br> |
| 19 | Fmoc-3-chloro-L-phenylalanine, (Fmoc-Phe(3-Cl)-OH)<br>       | Fmoc-3,4-dichloro-D-phenylalanine, (Fmoc-D-Phe(3,4-diCl)-OH)<br> | Fmoc-3-Iodo-L-tyrosine<br>                              | Fmoc-N-Nicotinoyl-L-lysine(Fmoc-Lys(nicotinoyl)-OH)<br>                        | Fmoc-nipetic acid (Fmoc-Nip-OH)<br>                                                  |
| 20 | Fmoc-1-Amino-1-cyclopentane carboxylic acid(Fmoc-Acp-OH)<br> |                                                                                                                                                     |                                                                                                                                            |                                                                                                                                                                     |                                                                                                                                                                           |

**Table 2. Thirty acylation reagents used for making library :  $R_1\text{COOH}$ ,  $R_1\text{COCl}$ , or  $R_1\text{SO}_2\text{Cl}$**

|   | A                                                                                                                          | B                                                                                                                    | C                                                                                                                             | D                                                                                                                      | E                                                                                                                       |
|---|----------------------------------------------------------------------------------------------------------------------------|----------------------------------------------------------------------------------------------------------------------|-------------------------------------------------------------------------------------------------------------------------------|------------------------------------------------------------------------------------------------------------------------|-------------------------------------------------------------------------------------------------------------------------|
| 1 | 5-Hydantoinacetic acid<br>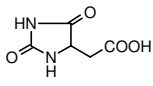                | Trans-4Cotinine-carboxylic acid<br> | Isonicotinic acid<br>                        | 3-Pyridinepropionic acid<br>        | 4-Hydroxyphenylacetic acid<br>       |
| 2 | 2-Pyrazinecarboxylic acid<br>             | Cyclopropane carboxylic acid<br>    | 3-Hydroxy-2-quinox-aline carboxylic acid<br> | 5-Bromovaleric acid<br>             | 2,5-Dimethoxyphenyl acetic acid<br>  |
| 3 | 3,4-Dimethoxybenzoyl chloride<br>         | 2-Thiophenesulfonyl chloride<br>    | 3-Thiophene carboxylic acid<br>              | 2-Thiophenecarboxylic acid<br>      | 2-Methylbutyric acid<br>             |
| 4 | 2-Thiophenacetyl chloride<br>             | Benzoic acid<br>                    | Furylacrylic acid<br>                        | 4-Nitrophenyl acetic acid<br>       | p-Toluenesulfonyl chloride<br>       |
| 5 | 4-(Dimethylamino) phenylacetic acid<br> | Phenoxyacetic acid<br>            | 3-(Dimethylamino) benzoic acid<br>         | Cyclohexane carboxylic acid<br>   | 2-Naphthalenesulfonyl chloride<br> |
| 6 | 4-Bromophenylacetic acid<br>            | 4-Bromobenzoic acid<br>           | 2-Phenoxybutyric acid<br>                  | 3,4-Dichlorophenylacetic acid<br> | (1-Naphthoxy)acetic acid<br>       |

**Table 3. 45 Carboxylic acids used for library synthesis : R<sub>2</sub>COOH, R<sub>2</sub>COCl, or R<sub>2</sub>SO<sub>2</sub>Cl**

|   | A                                                                                                                     | B                                                                                                                   | C                                                                                                                            | D                                                                                                                              | E                                                                                                                                      | F                                                                                                                                                            |
|---|-----------------------------------------------------------------------------------------------------------------------|---------------------------------------------------------------------------------------------------------------------|------------------------------------------------------------------------------------------------------------------------------|--------------------------------------------------------------------------------------------------------------------------------|----------------------------------------------------------------------------------------------------------------------------------------|--------------------------------------------------------------------------------------------------------------------------------------------------------------|
| 1 | Diglycolic anhydride<br>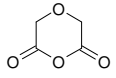             | 2,5-Thiophenedicarboxylic acid<br> | L-Pyroglutamic acid<br>                     | Glutaric anhydride<br>                        | Malonic acid<br>                                    | 4-Acetamidobenzoic acid<br>                                               |
| 2 | Trans-4 Cotinine carboxylic acid<br> | Levulinic acid<br>                 | 3,5-Dihydroxy benzoic acid<br>              | Boc-1-aminocyclopropane-1-carboxylic acid<br> | 4-Bromo-3,5-dihydroxy benzoic acid<br>              | Boc-D-1,2,3,4-tetrahydroisoquinoline-3-carboxylic acid(Boc-D-Tic- OH)<br> |
| 3 | 3-Pyridinepropionic acid<br>         | 4-Hydroxyphenyl acetic acid<br>    | 3-Hydroxy-2-quinoxaline carboxylic acid<br> | 2-Phenyl-4-quinoline carboxylic acid<br>     | (S)-(+)-Oxo-4-phenyl-3-oxazolidinoneacetic acid<br> | Valeric acid<br>                                                          |
| 4 | 3-Thiophene carboxylic acid<br>     | 2-Thiophene carboxylic acid<br>   | 2,6-Dichloro-nicotinic acid<br>            | 3-Nitrophenylacetic acid<br>                | 4-(Dimethylamino) phenylacetic acid<br>            | 4-(Dimethylamino)-benzoic acid<br>                                       |
| 5 | 2,5-Dimethoxy benzoic acid<br>     | Phenoxyacetic acid<br>           | 3-(Dimethylamino) benzoic acid<br>        | 3-Benzoyl-2-pyridinecarboxylic acid<br>    | Hexanoic acid<br>                                 | 3,4-Difluorobenzoic acid<br>                                            |
| 6 | Indole-2-carboxylic acid<br>       | Phenylpropionic acid<br>         | 4-Bromobenzoic acid<br>                   | 4-Bromophenylacetic acid<br>               | 1-Naphthylacetic acid<br>                         | (1-Naphthoxy) acetic acid<br>                                           |
| 7 | 2-Biphenylcarboxylic acid<br>      | 2-Phenoxybutyric acid<br>        | 2,4-Dichlorophenyl acetic acid<br>        | 3,4-Dichlorophenyl acetic acid<br>         | (2-Naphthoxy) acetic acid<br>                     | 5-(4-Chlorophenyl)-2-furoic acid<br>                                    |
| 8 | 4-Biphenylcarboxylic acid<br>      | 4-Phenoxybenzoic acid<br>        | Butyric acid<br>                          |                                                                                                                                |                                                                                                                                        |                                                                                                                                                              |

Copy of <sup>13</sup>C-NMR for compound 8

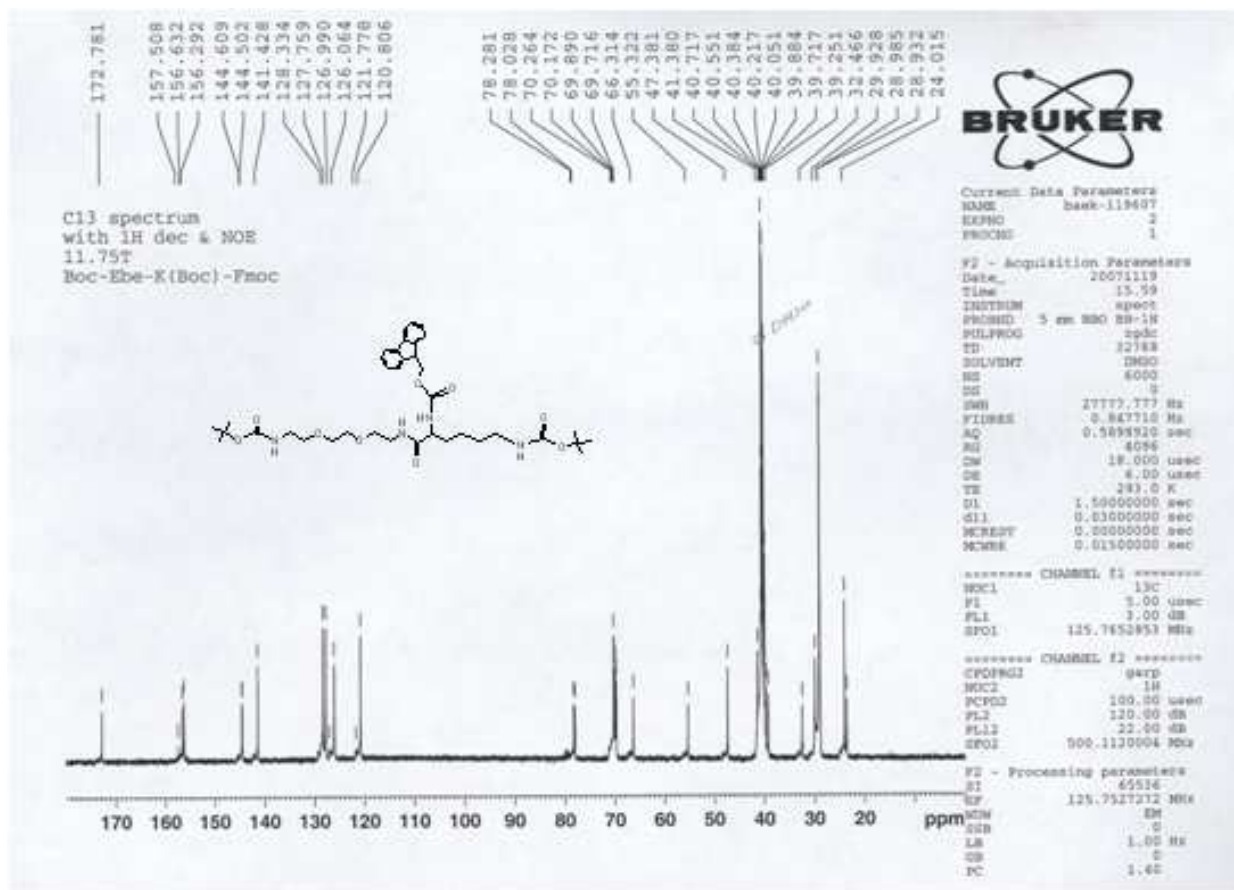

Copy of <sup>1</sup>H-NMR for compound 8

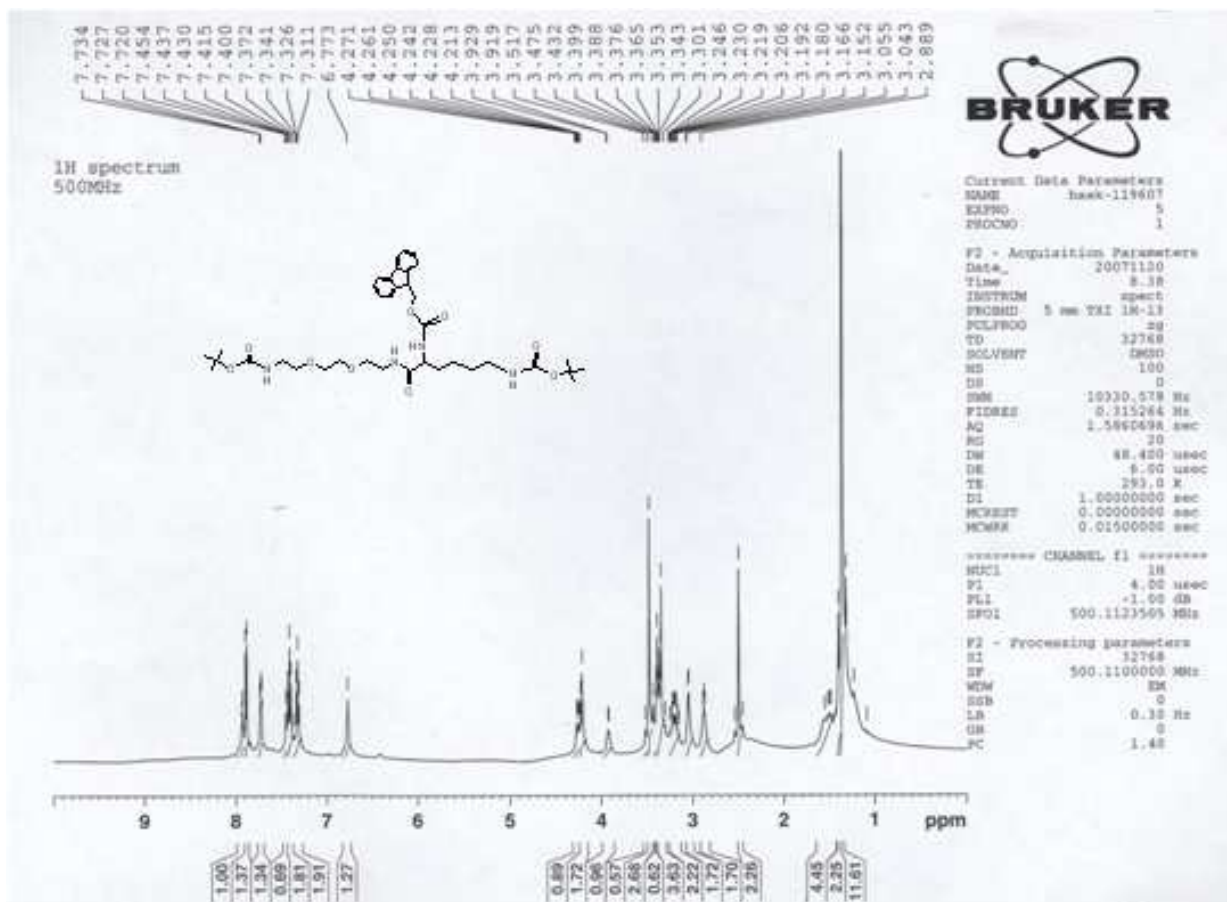











# Copy of $^{13}\text{C}$ -NMR for compound 13

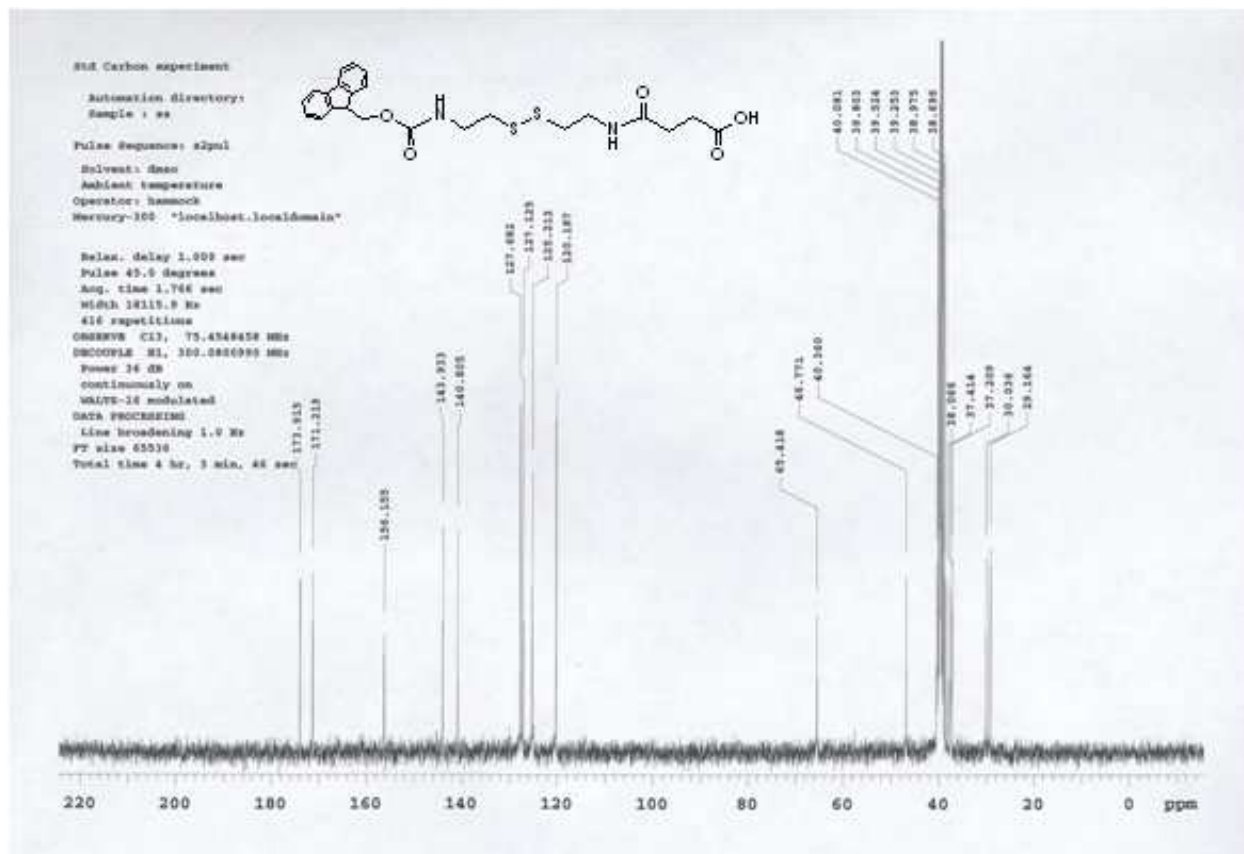



# Copy of MS for compound 13

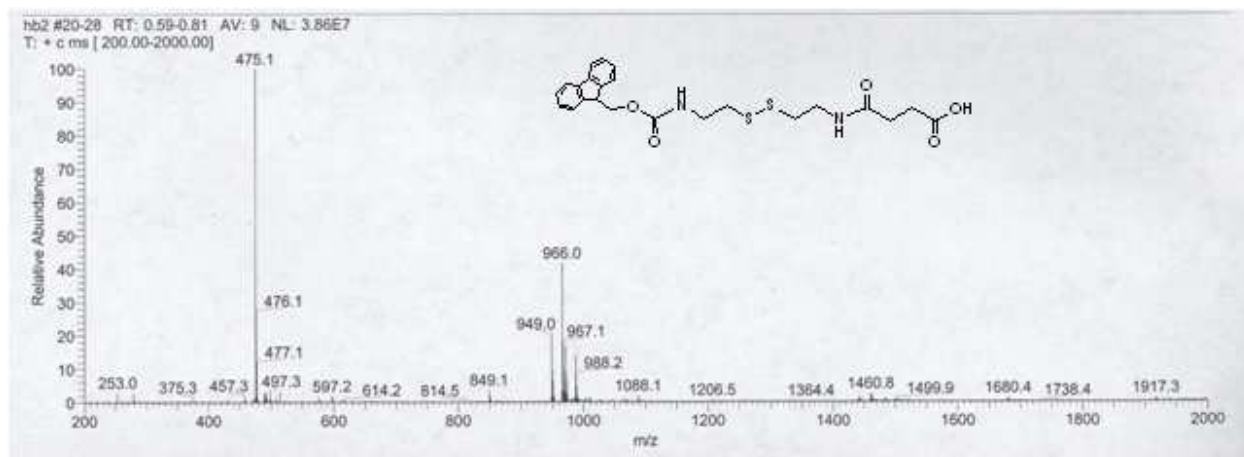

Copy of <sup>13</sup>C-NMR for compound Fmoc-Ebes-OH

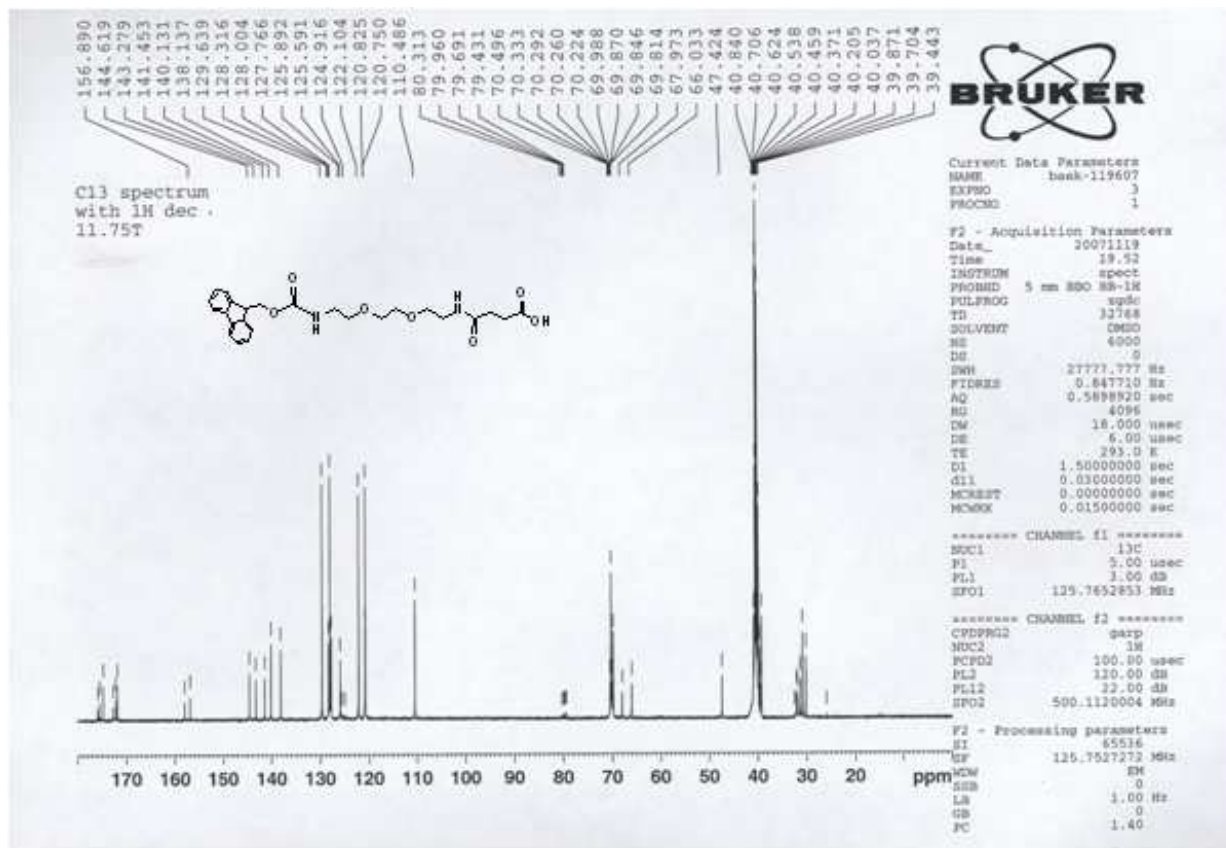

Copy of <sup>1</sup>H-NMR for compound Fmoc-Ebes-OH

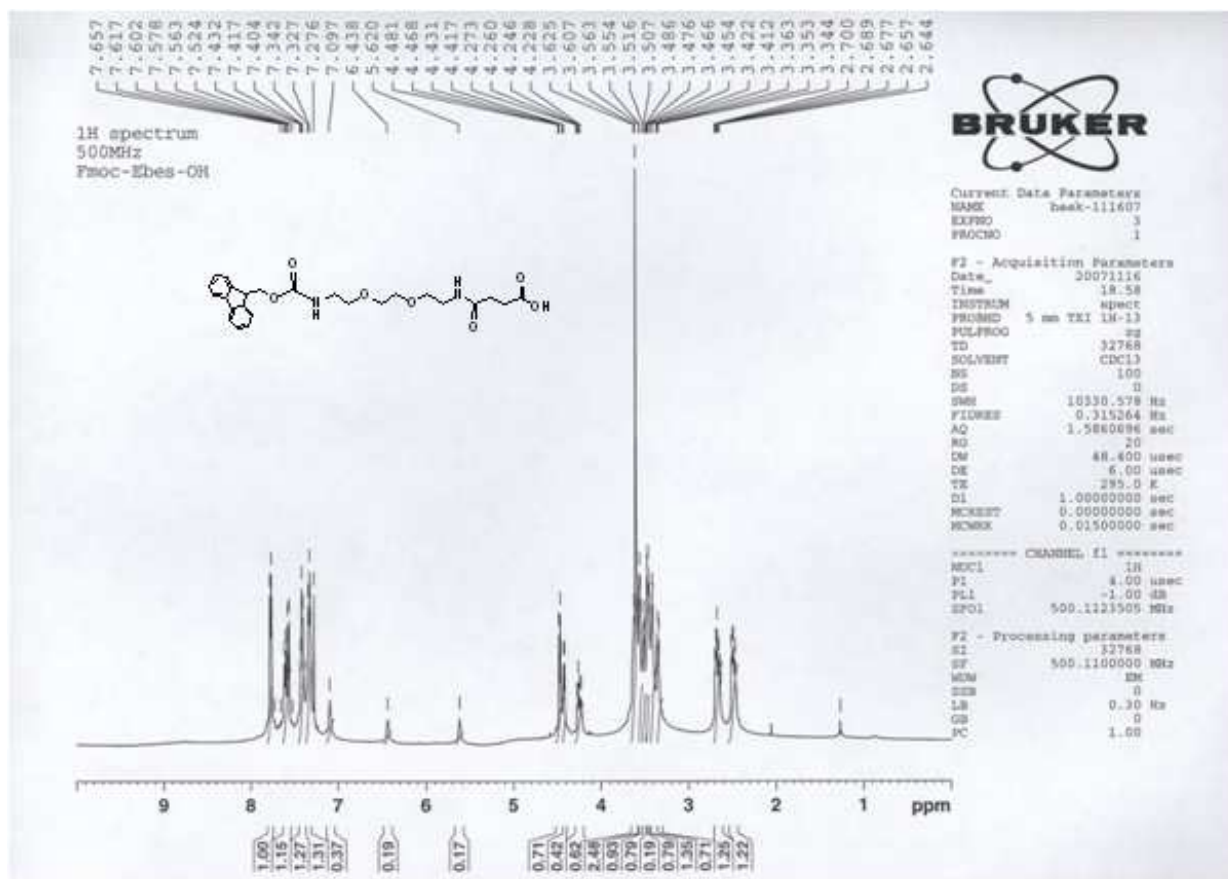



# Copy of MS for compound Fmoc-Ebes-OH

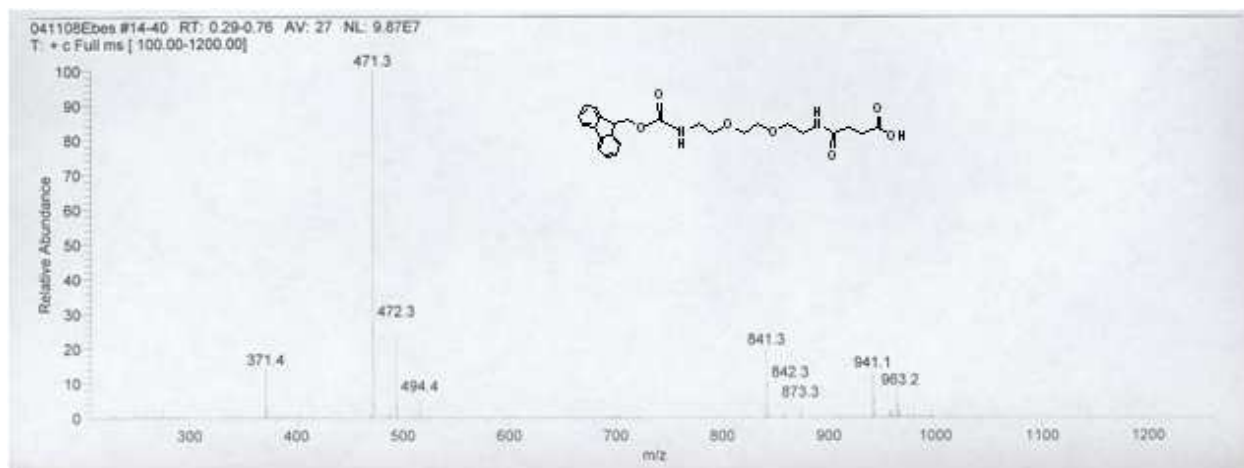

Supplement: NIHMS91288-supplement-1_si_001.pdf [file NIHMS91288-supplement-1_si_001.pdf]
